# Supplementary material
Source: Springer Nature journal article supplement (https://www.springermedizin.de/resource/supplementary/12889_2012_4774_MOESM1_ESM.pdf/9493322)

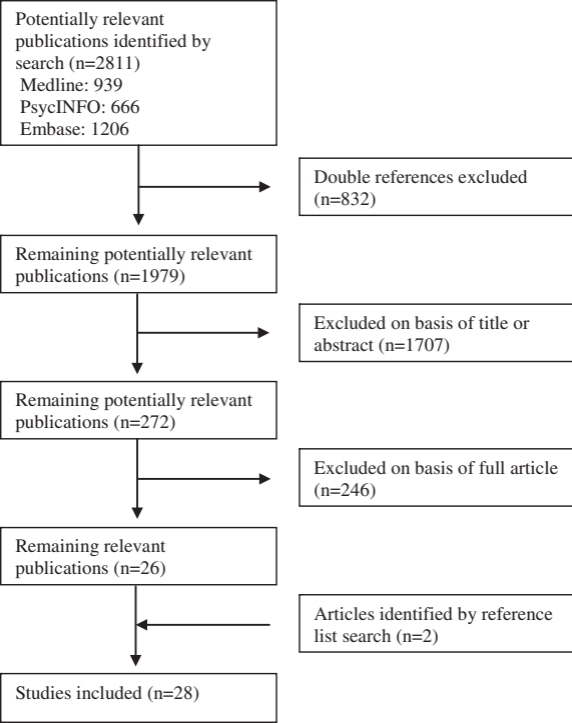

Supplement: MOESM1 [file 9493322]
